# Supplementary material
Source: PubMed Central journal article supplement (PMC3318107)

# Supplemental Figure 1

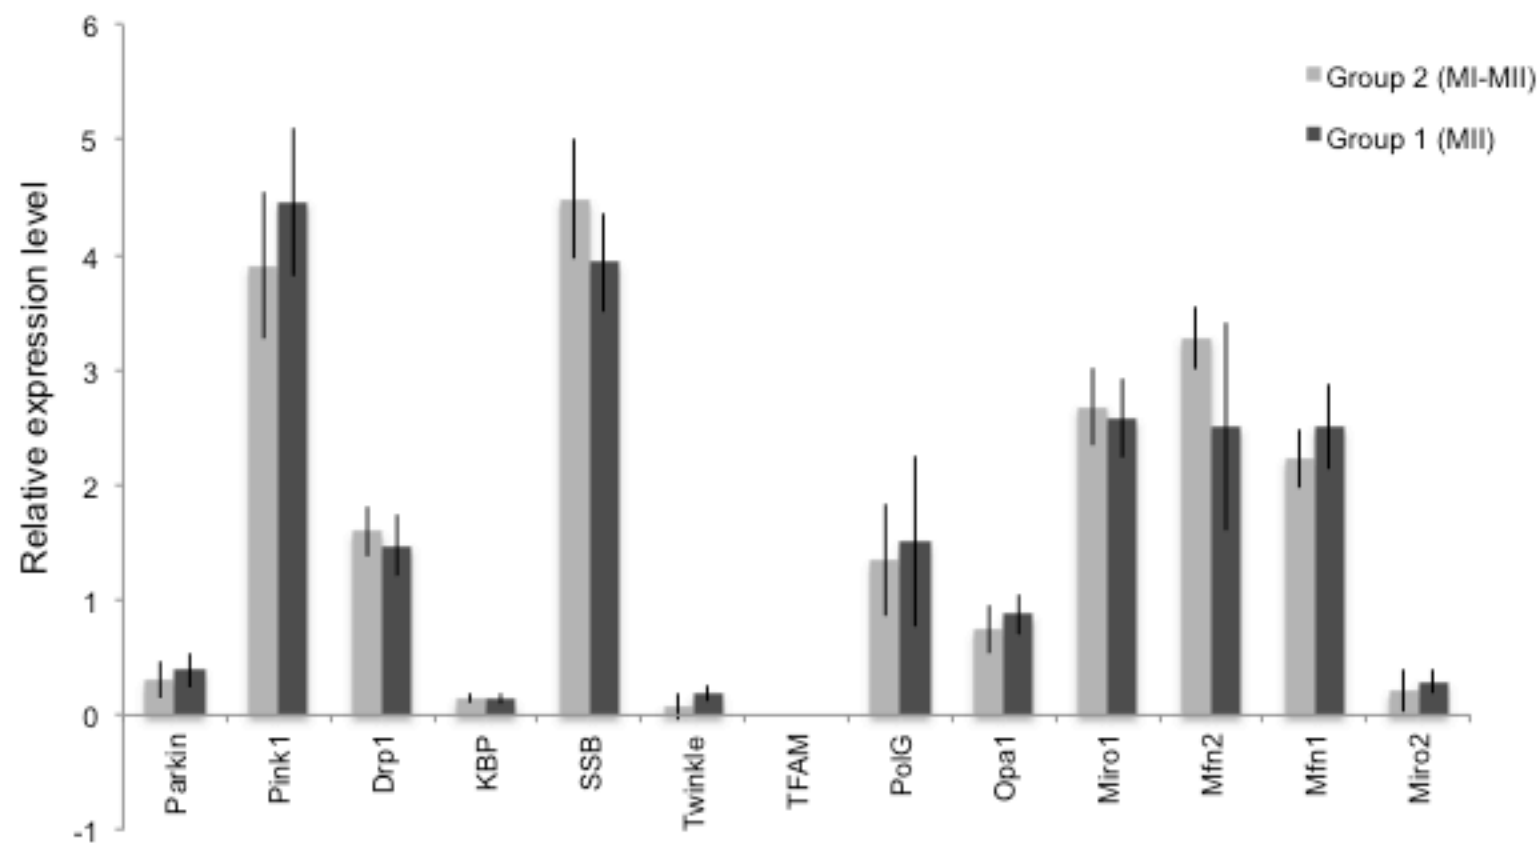

Supplement: cc1104_0740SD1.pdf [file cc1104_0740SD1.pdf]
